# Supplementary material for: Histone variants shape chromatin states in Arabidopsis
Source: eLife journal article supplement (doi:10.7554/elife.87714), 2023-05-17

**Figure 3-Figure Supplement 2A**

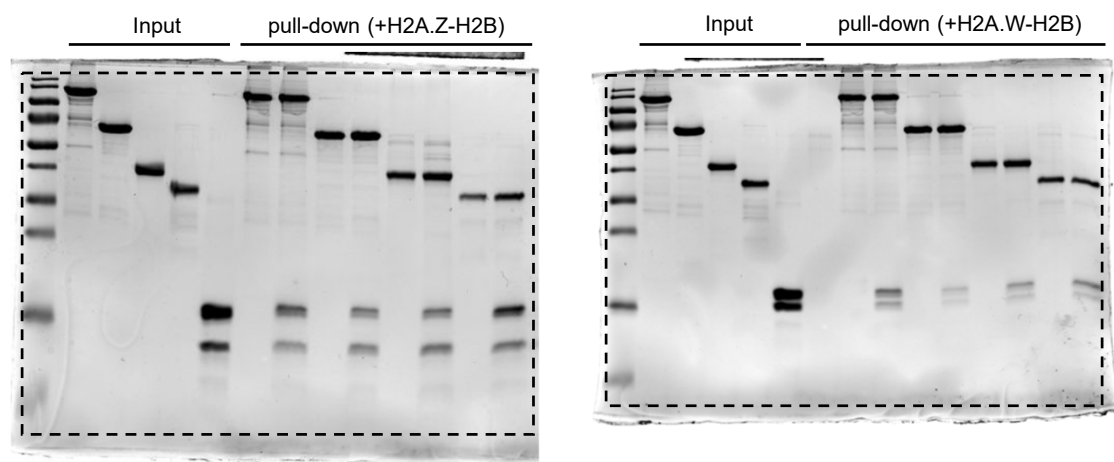

**Figure 3-Figure Supplement 2B**

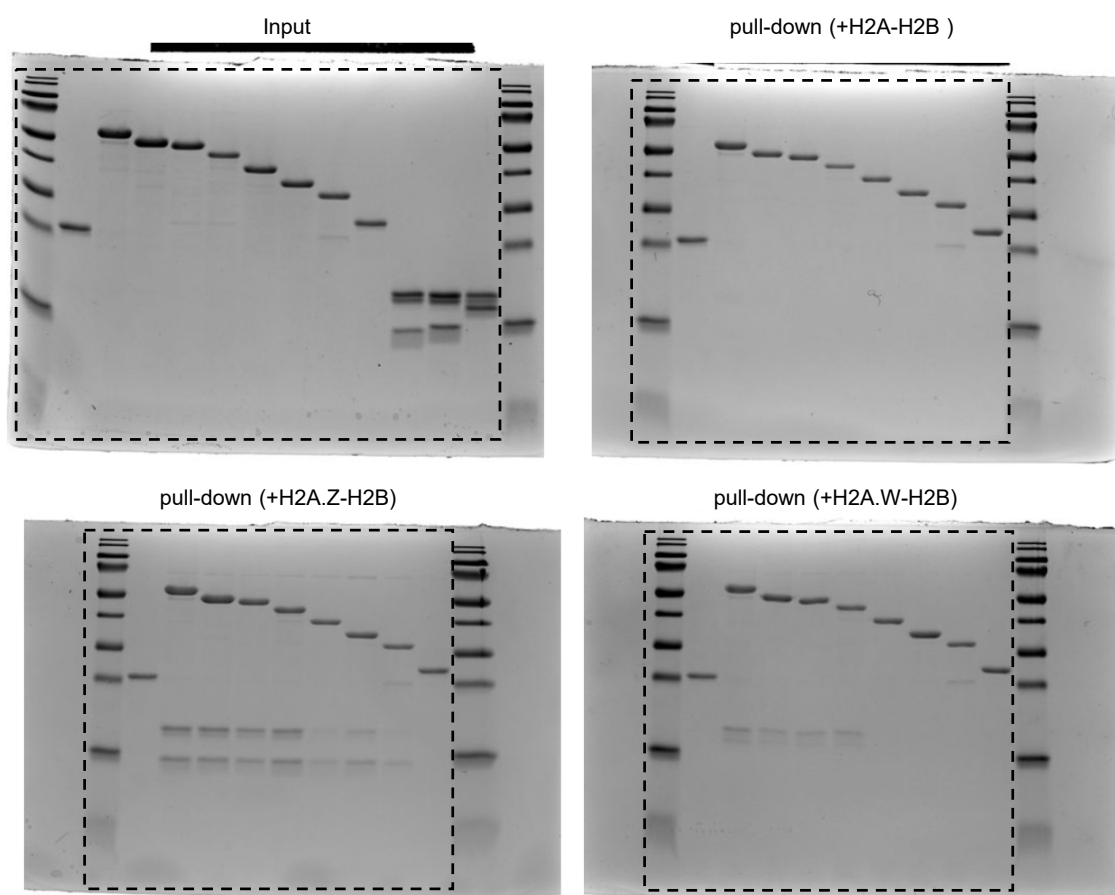

**Figure 3-Figure Supplement 2C left panels**

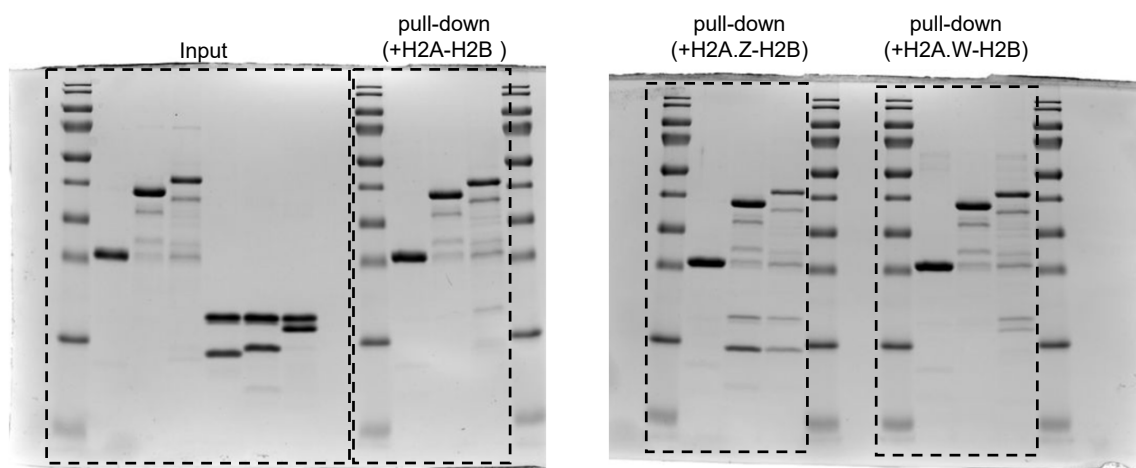

**Figure 3-Figure Supplement 2C right panels**

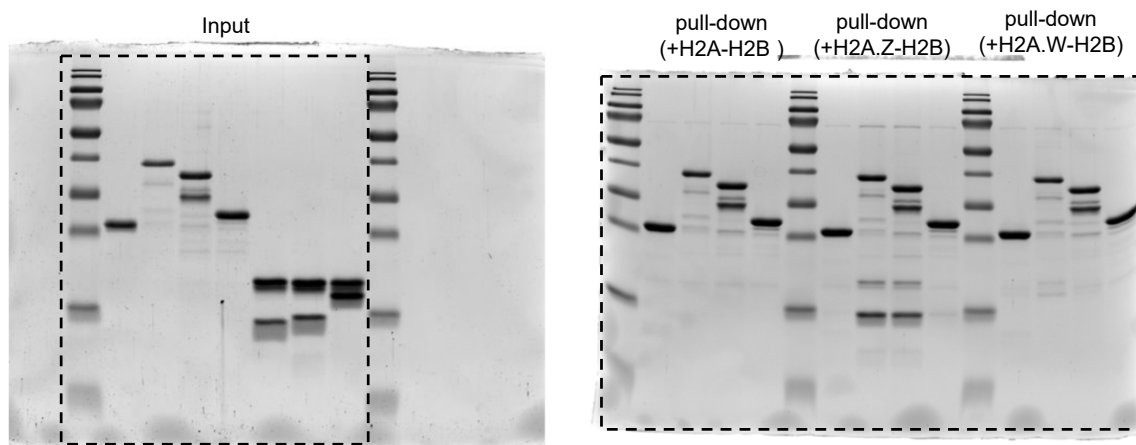

Supplement: fig3-figsupp2-data1 [file elife-87714-fig3-figsupp2-data1-v1.zip]
