# Supplementary figures and images for: Histone variants shape chromatin states in Arabidopsis
Source: eLife journal article supplement (doi:10.7554/elife.87714), 2023-05-17

Figure 1B

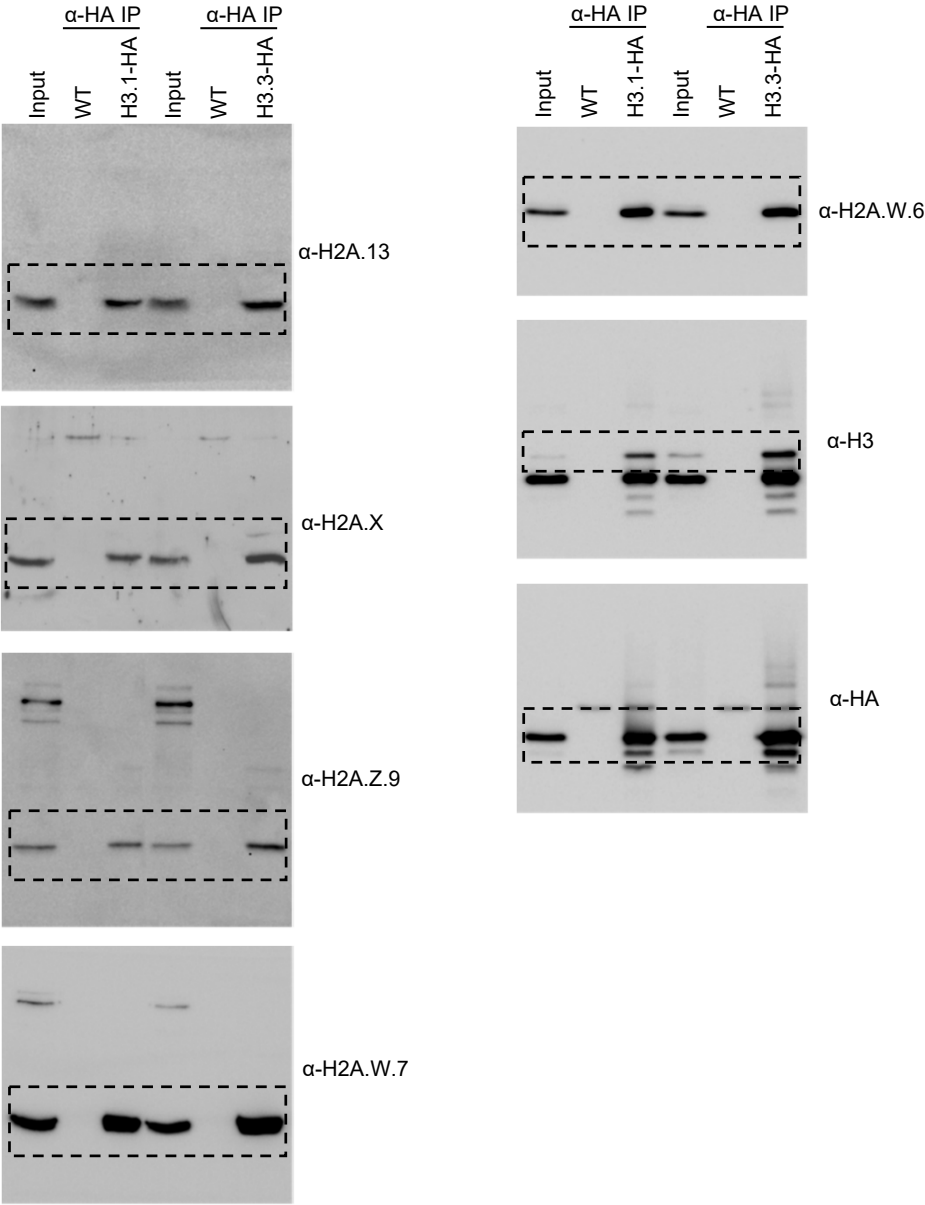

Supplement: fig1-data1 [file elife-87714-fig1-data1-v1.zip]

**Figure 1C**

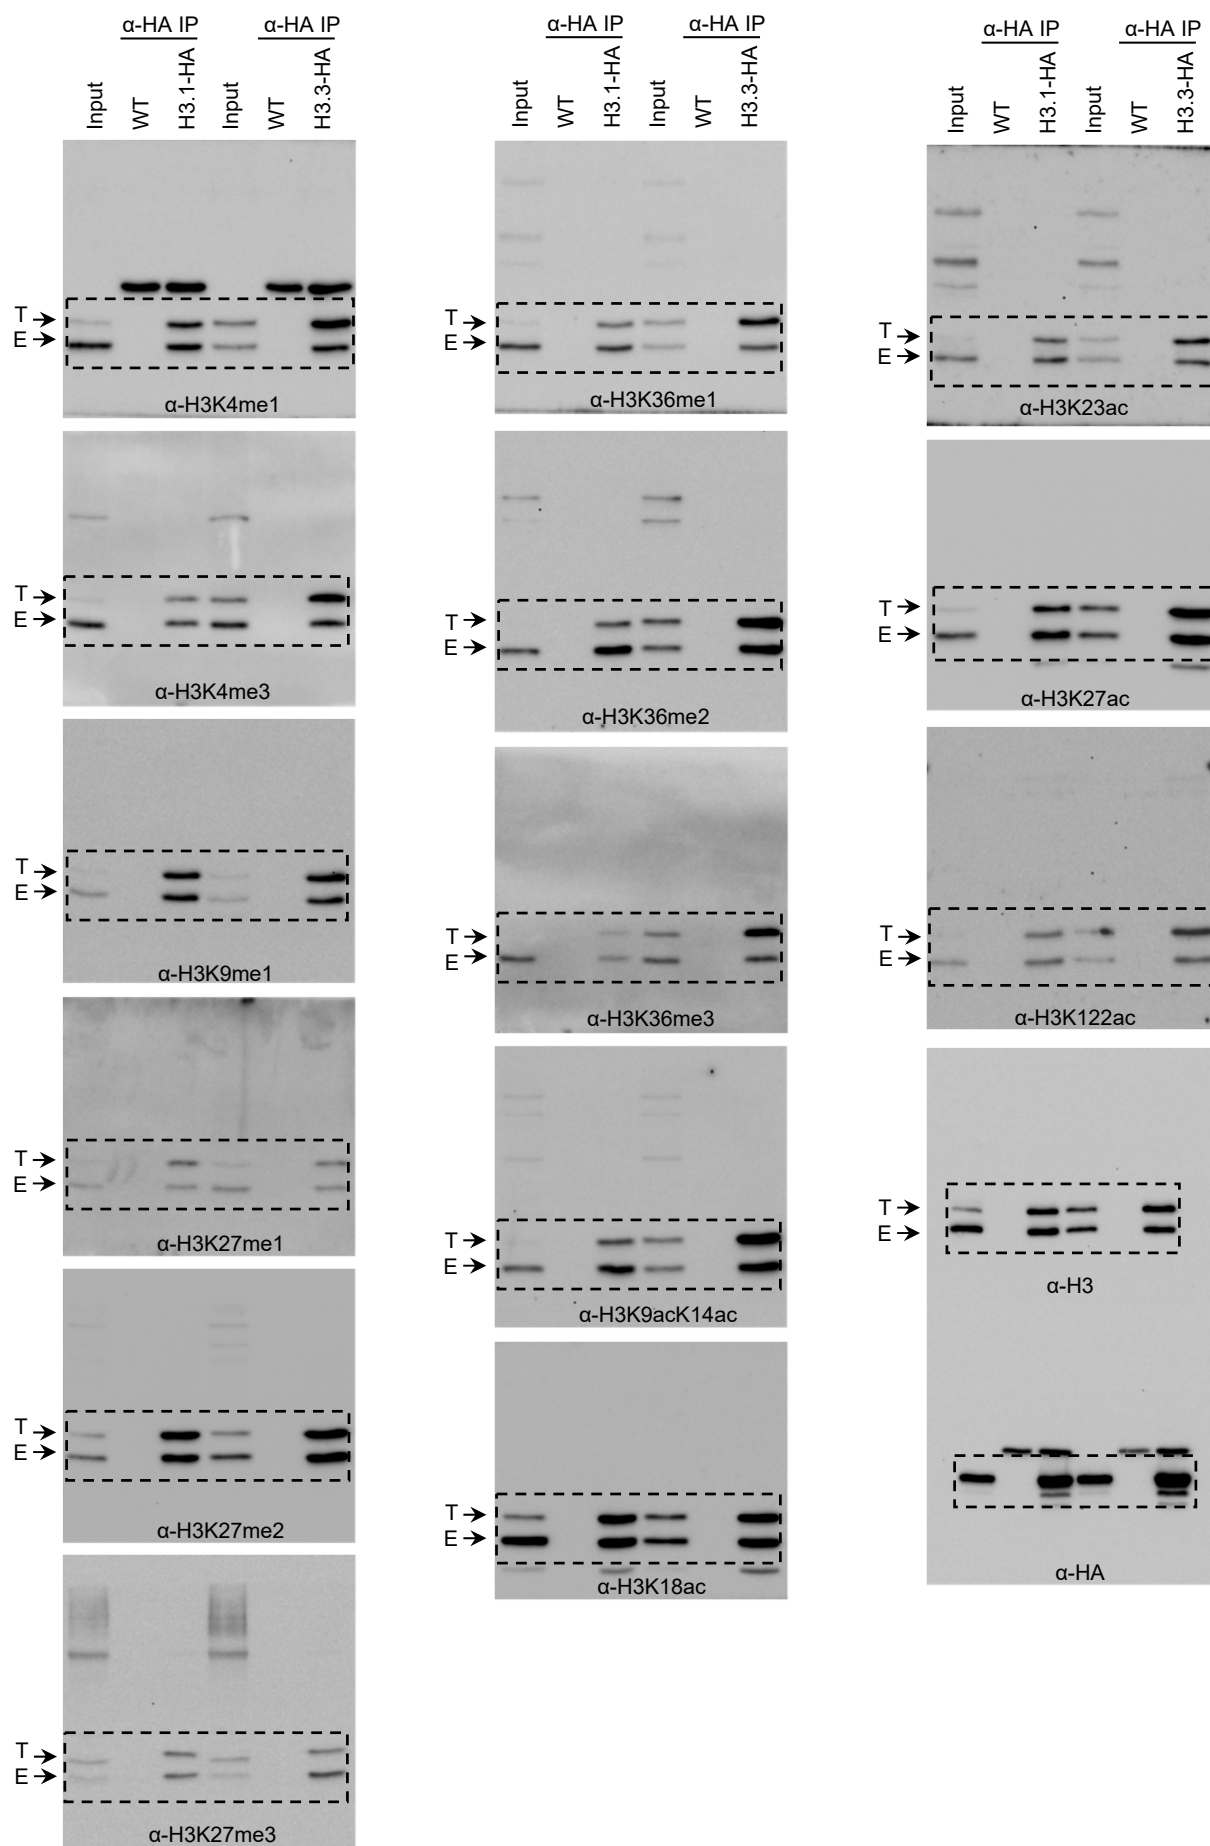

Supplement: fig1-data2 [file elife-87714-fig1-data2-v1.zip]

Figure 1F – left panels

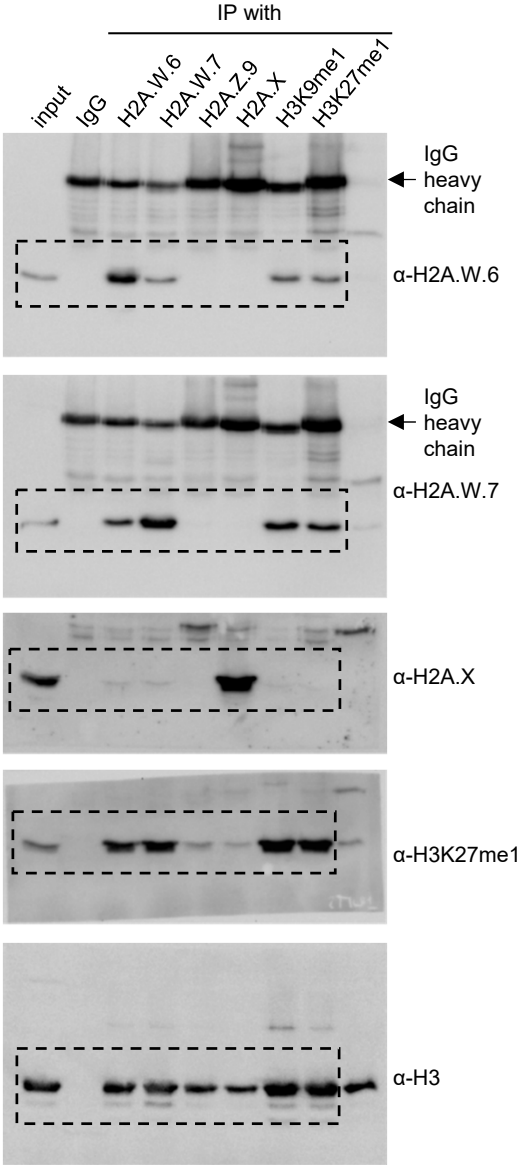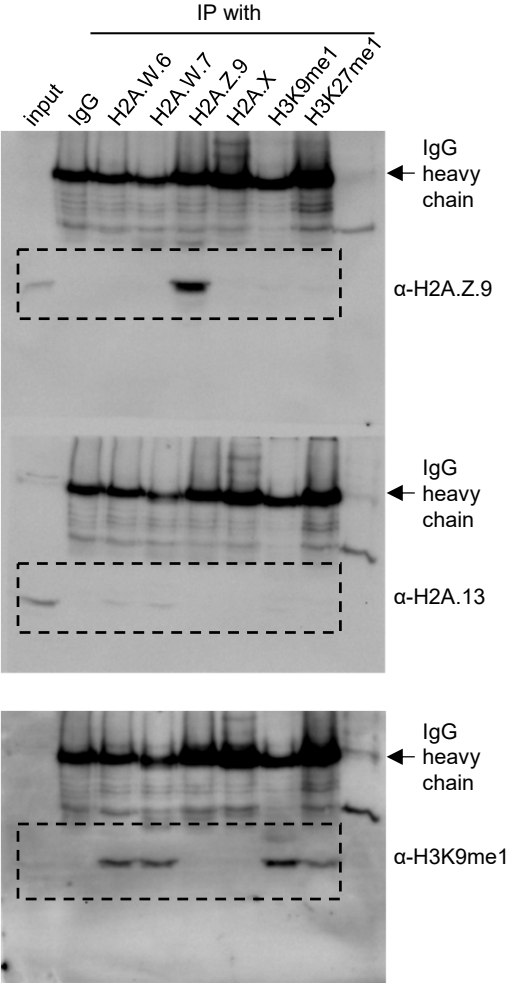

**Figure 1F – middle panels**

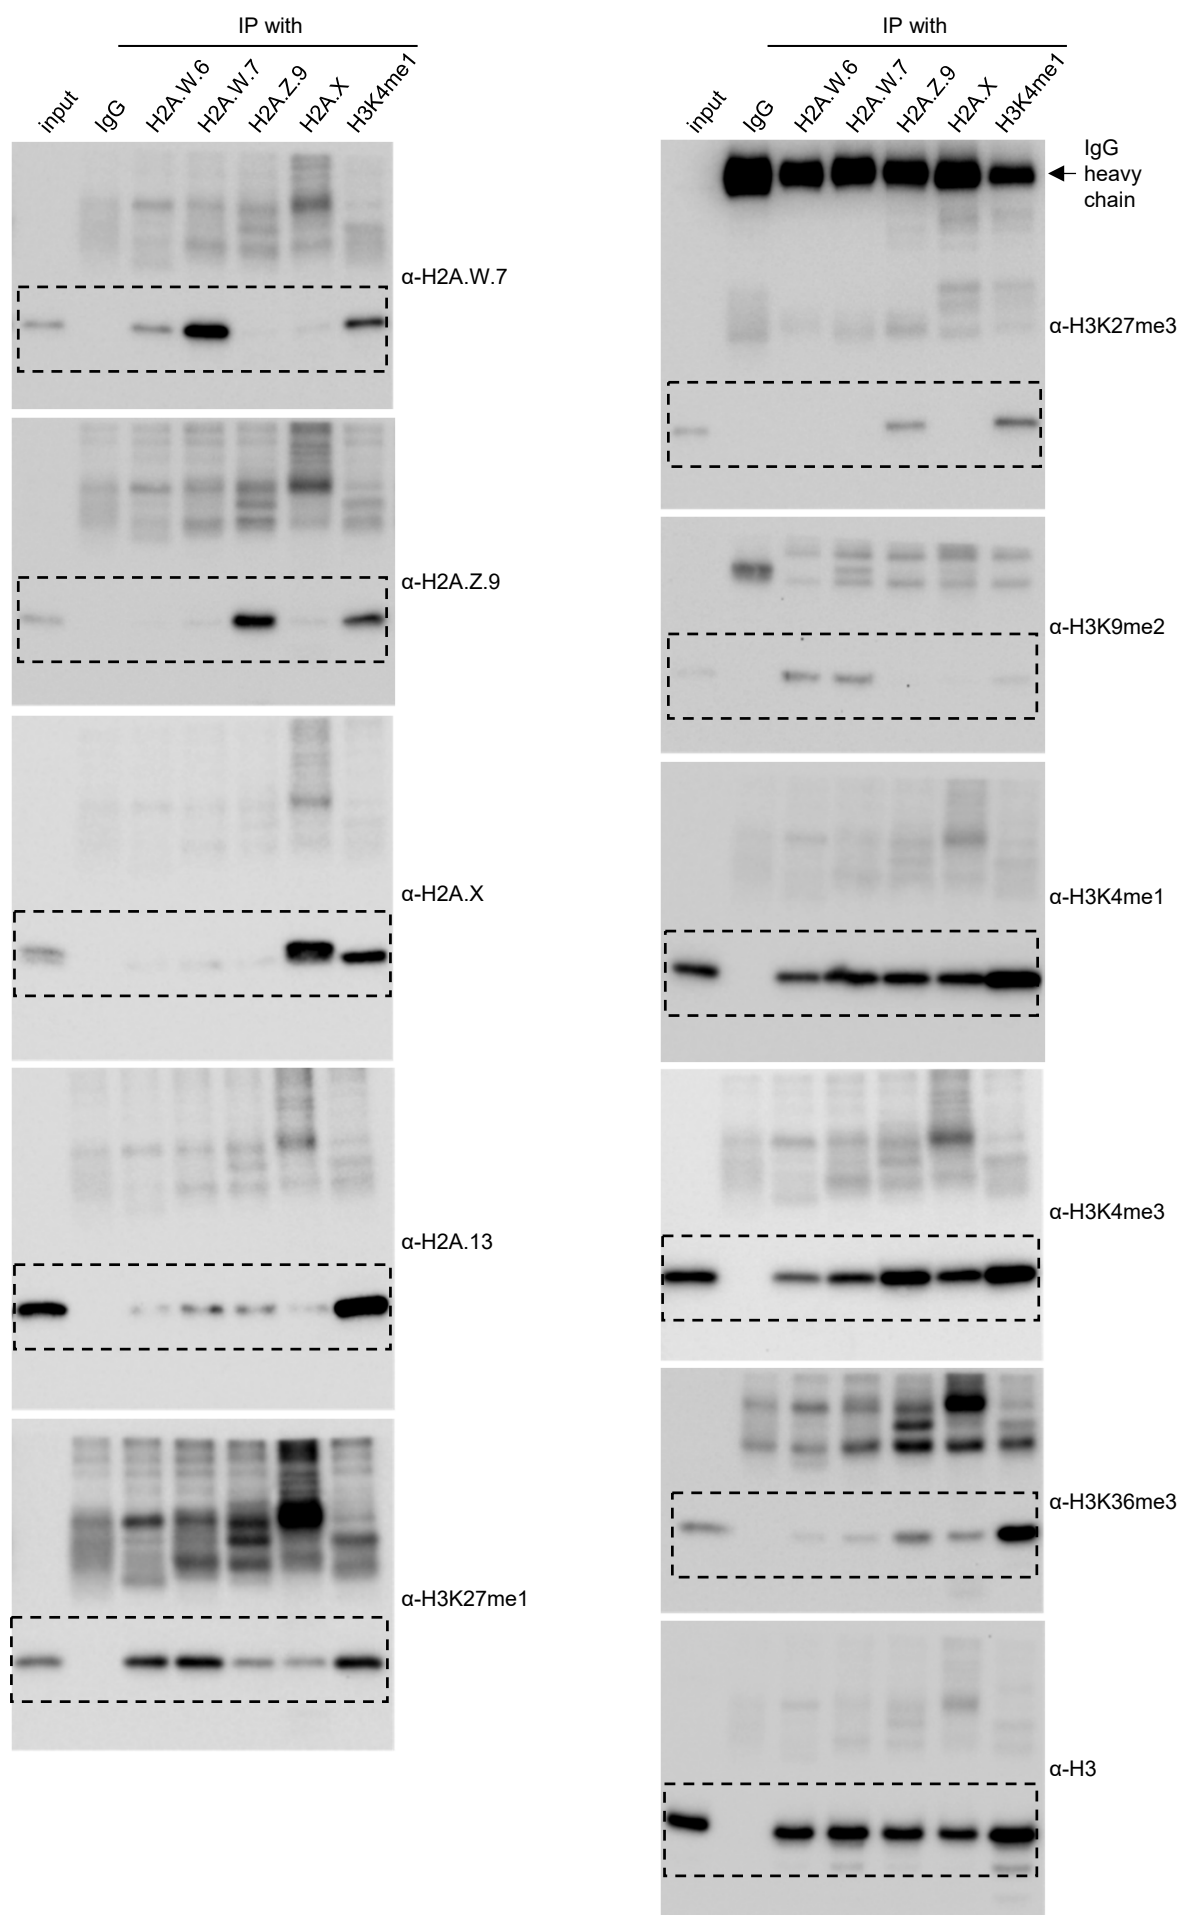

Figure 1F – right panels

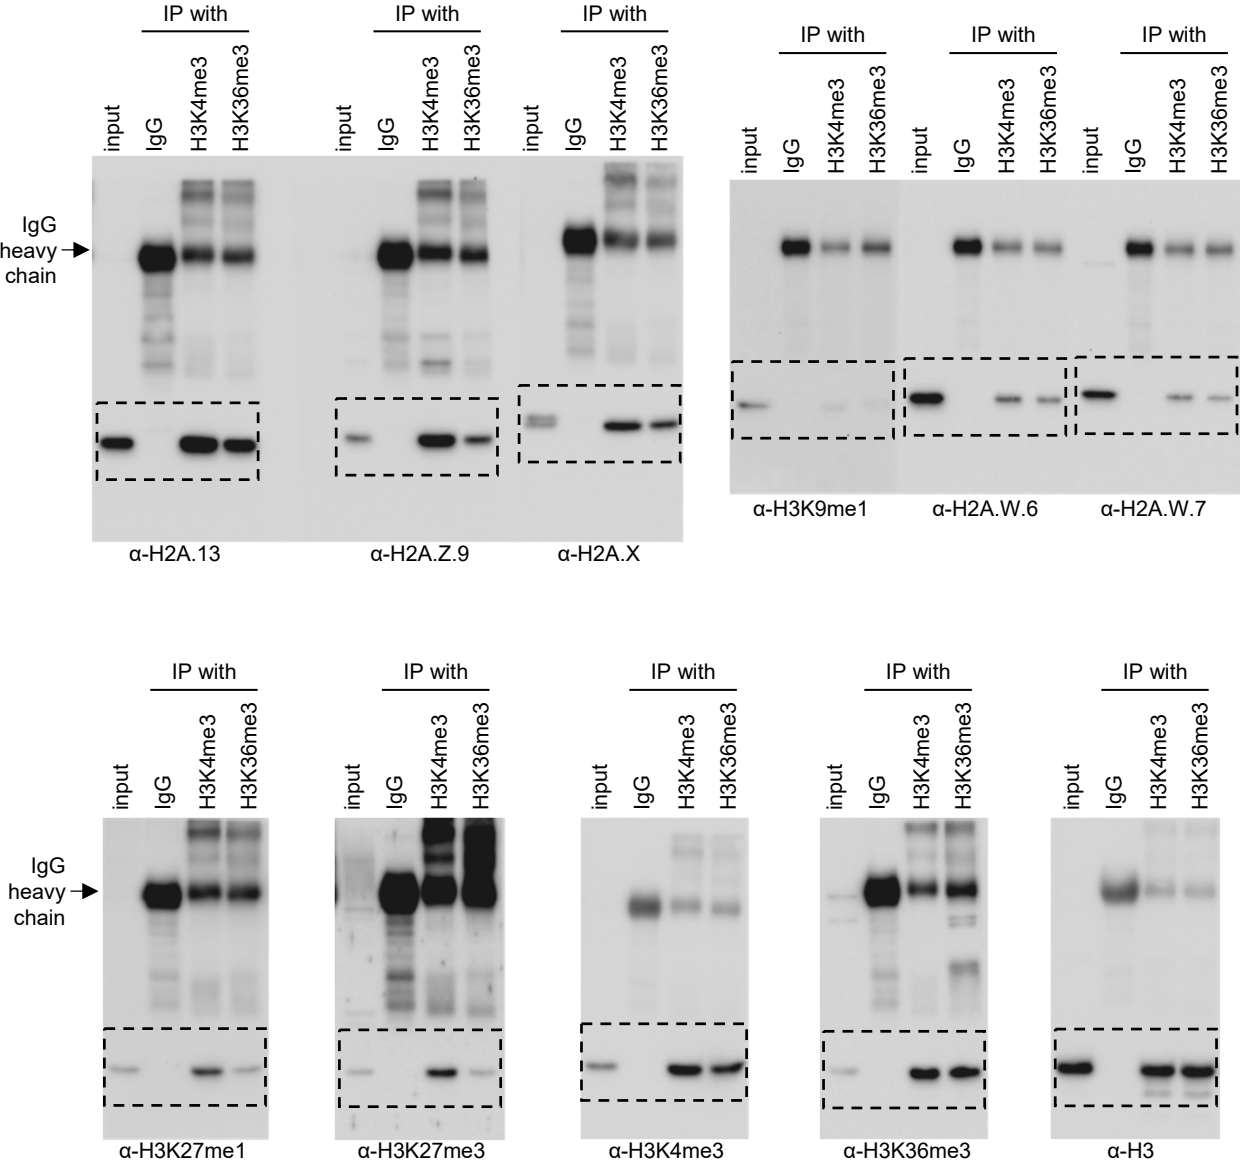

Supplement: fig1-data3 [file elife-87714-fig1-data3-v1.zip]

Figure 1-Figure Supplement 1B

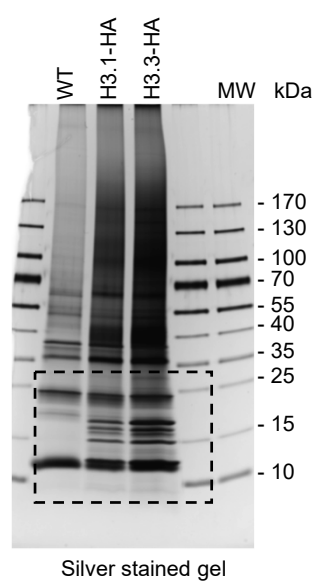

Supplement: fig1-figsupp1-data1 [file elife-87714-fig1-figsupp1-data1-v1.zip]

Figure 2-Figure Supplement 1B

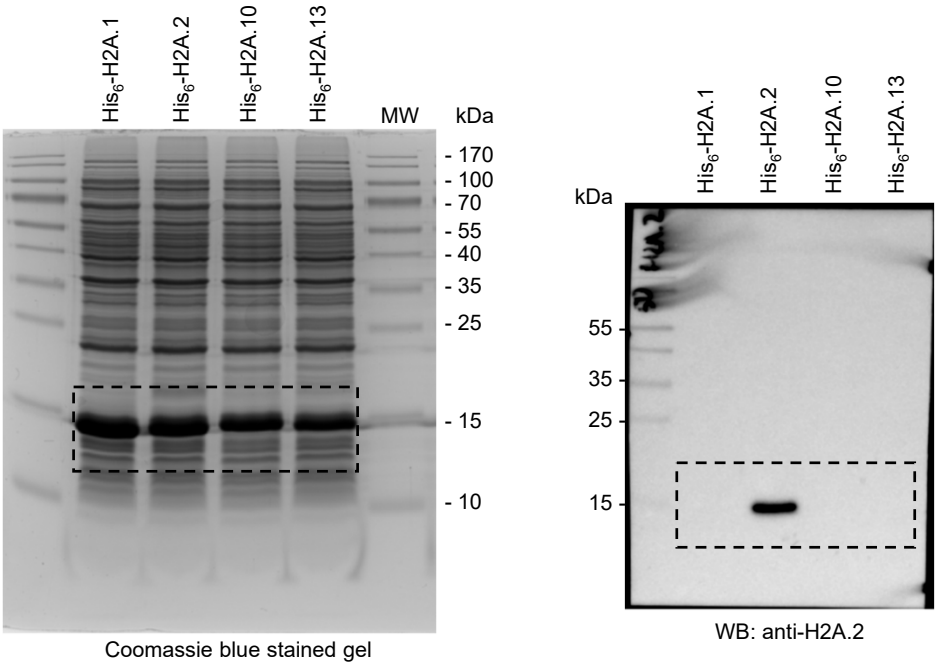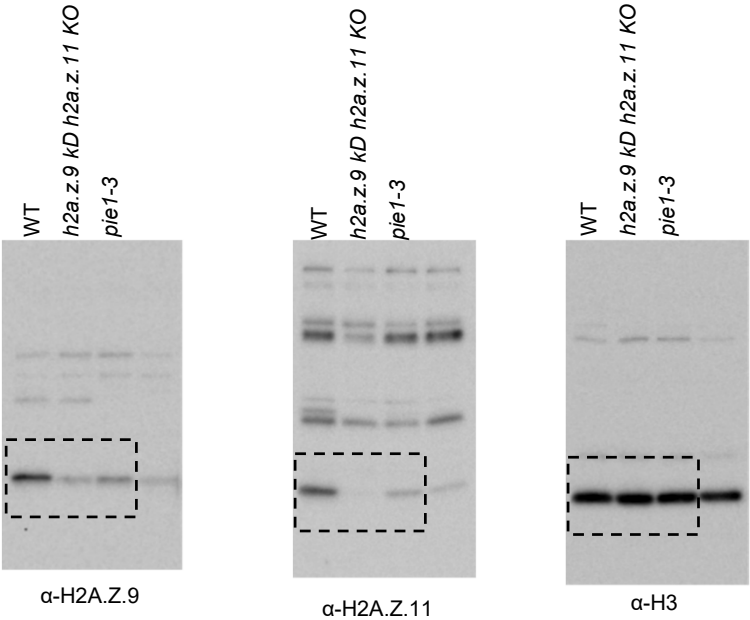

Supplement: fig2-figsupp1-data1 [file elife-87714-fig2-figsupp1-data1-v1.zip]

**Figure 3G**

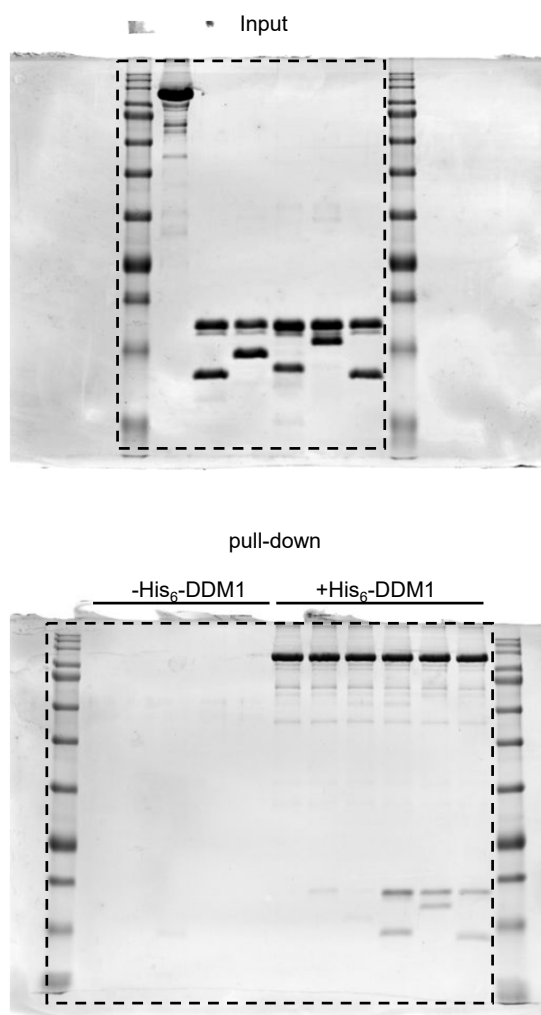

Supplement: fig3-data1 [file elife-87714-fig3-data1-v1.zip]
